# Supplementary material
Source: publisher figshare collection journal article supplement (https://sage.figshare.com/ndownloader/files/24045178)

**Appendix B**

Study 2 Displays: Slope 0, Slope 0.5, Slope 1.0


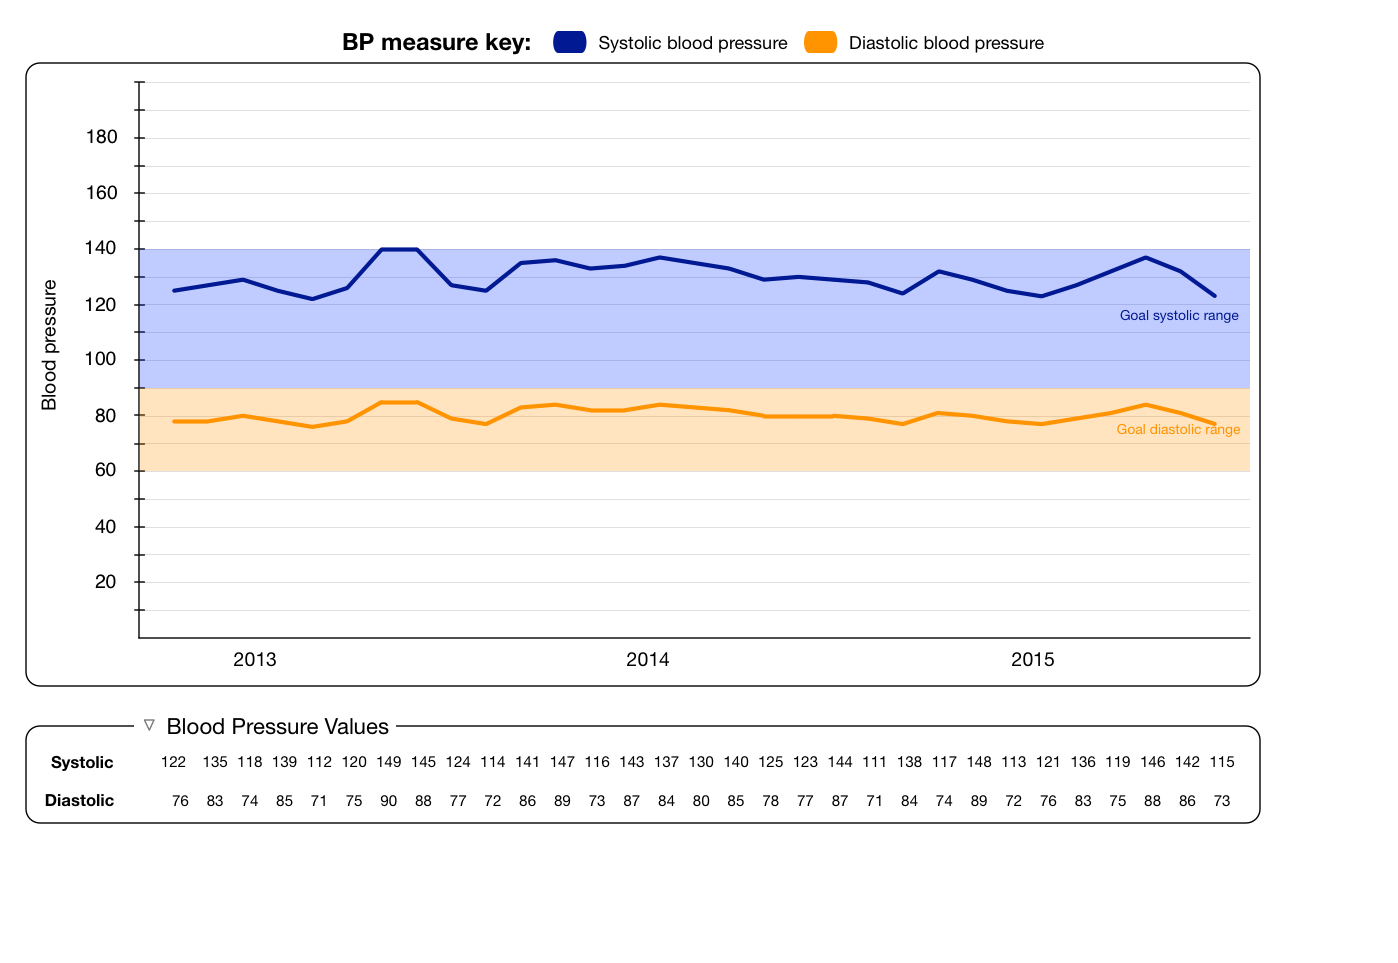


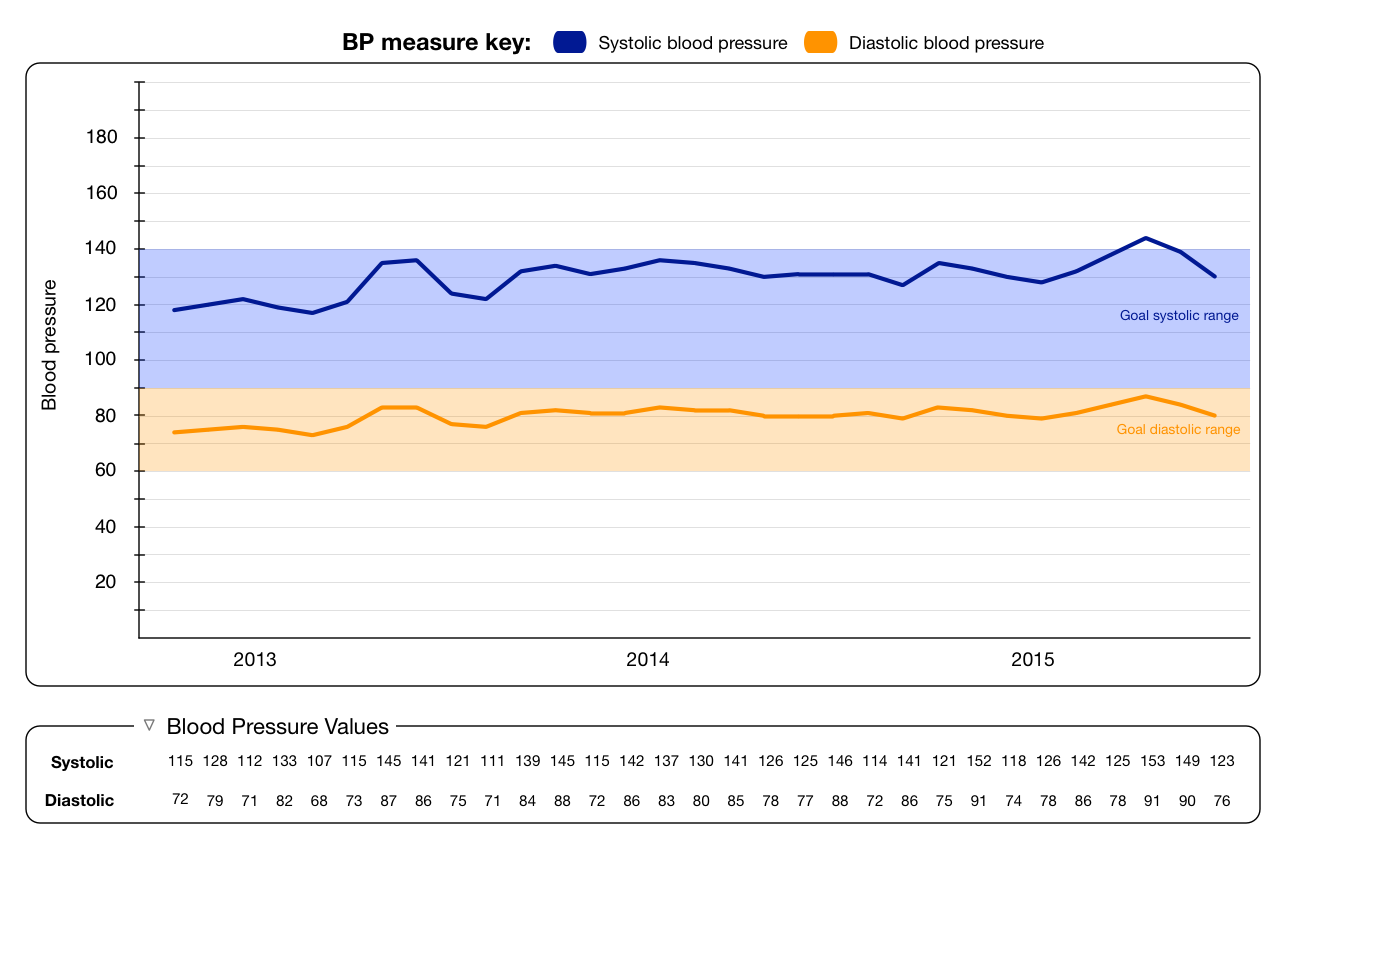


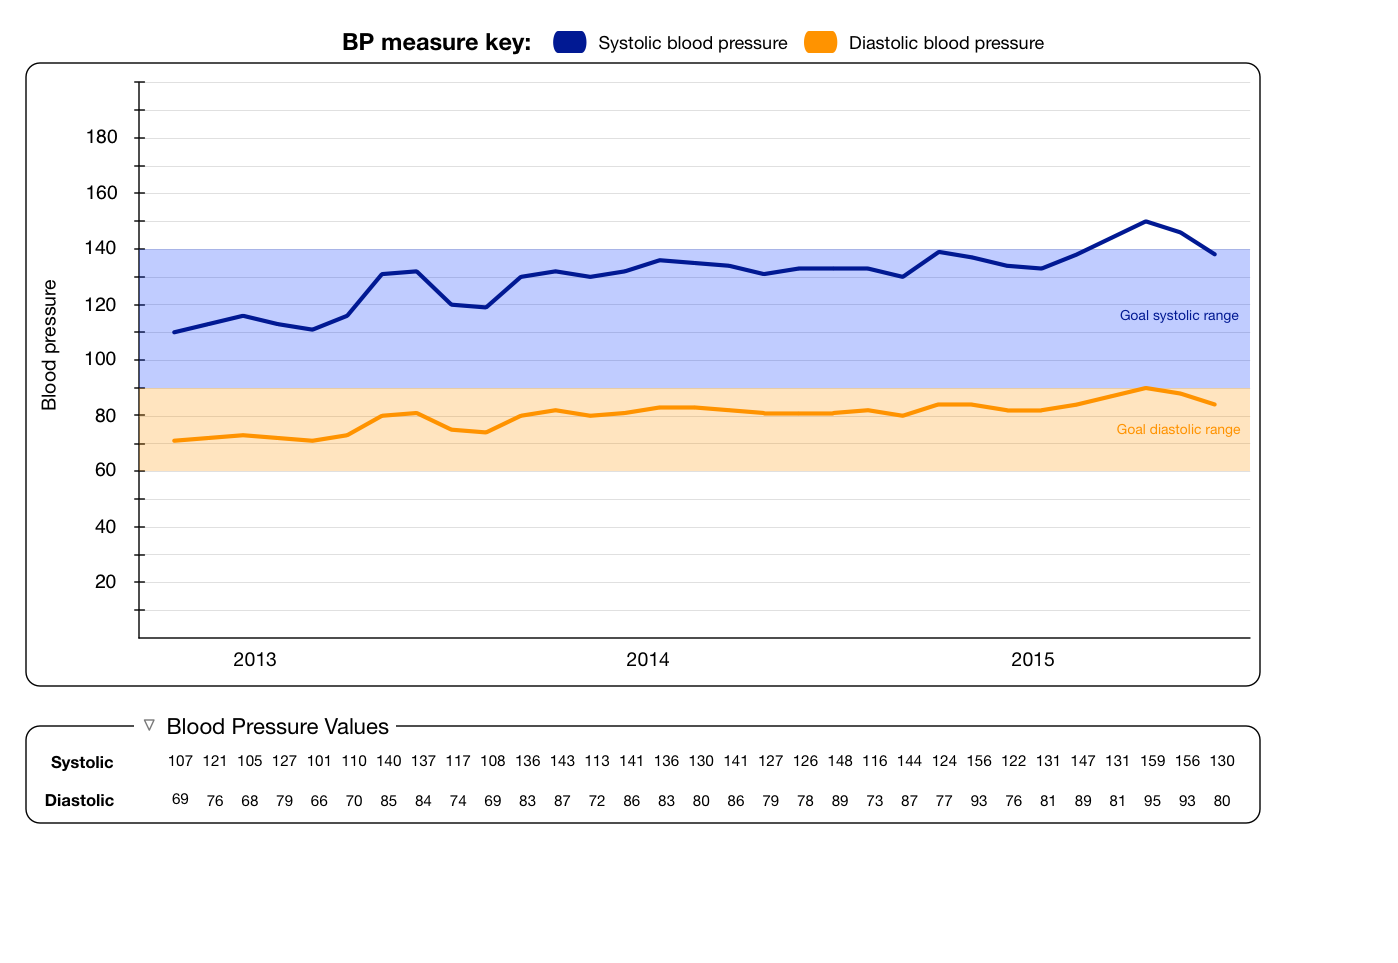

Supplement: Supplementary file 1 [file 24045178]
